# Supplementary material
Source: publisher figshare collection journal article supplement (https://acs.figshare.com/ndownloader/files/4187020)

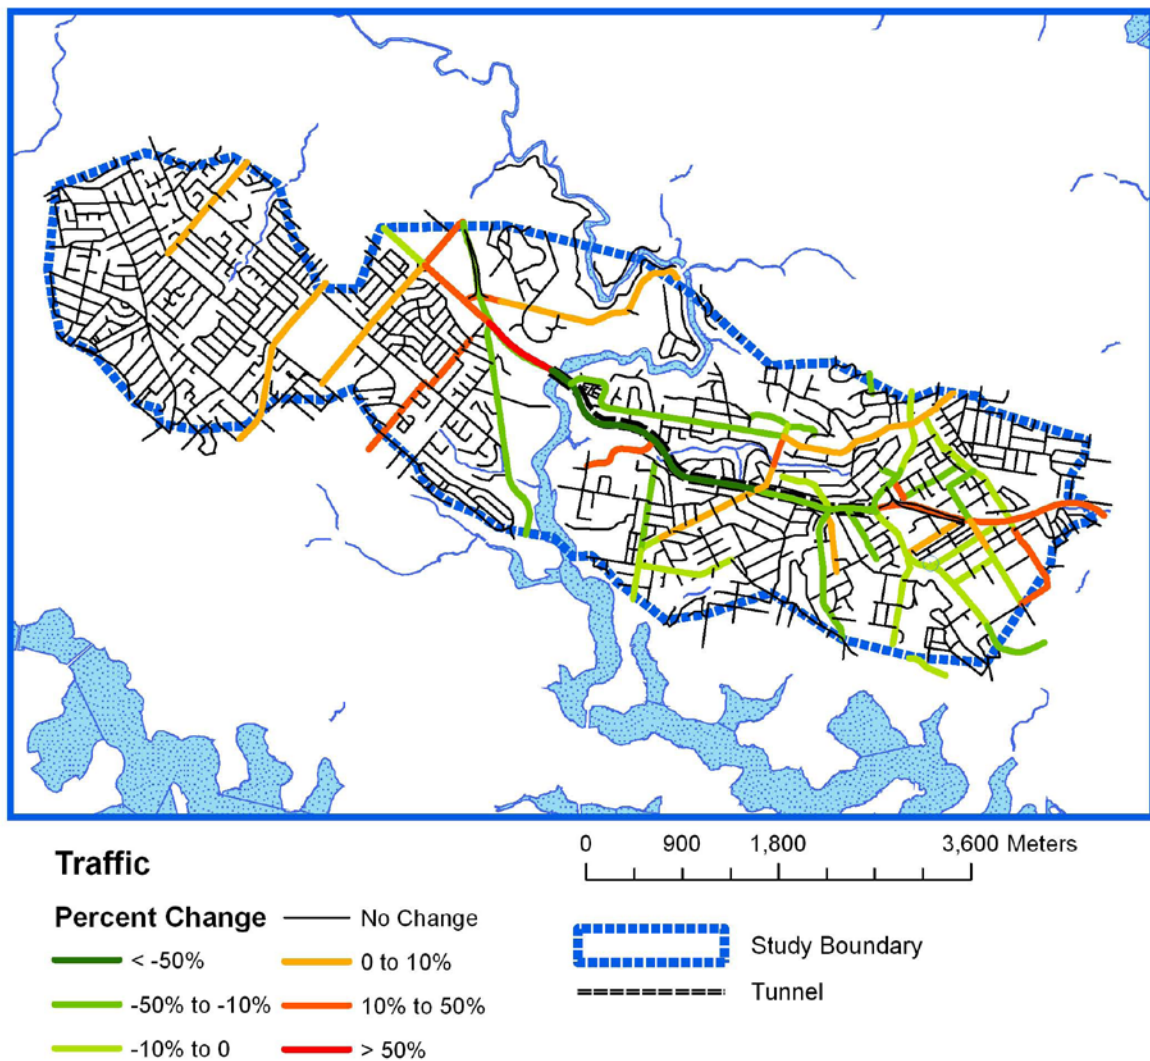

Figure S1. Percentage change in traffic counts between 2006 and 2008

Supplement: Supplementary file 1 [file 4187020]
